# Supplementary material
Source: PubMed Central journal article supplement (PMC9006785)
Supplement: NEJMoa2202826_disclosures.pdf [file NEJMoa2202826_disclosures.pdf]

Disclosure Purpose: 22-02826

Summary of Interests

**Company or Organization**

| Entity                                                                                                                                                                                                                                                                                                                                                                                                                                                                 | Type             | Interest Held By |
|------------------------------------------------------------------------------------------------------------------------------------------------------------------------------------------------------------------------------------------------------------------------------------------------------------------------------------------------------------------------------------------------------------------------------------------------------------------------|------------------|------------------|
| <a href="#">Centers for Disease Control and Prevention</a>                                                                                                                                                                                                                                                                                                                                                                                                             | Grant / Contract | Self             |
| <p><i>Recipient Name:</i> Riley Hospital for Children/Indiana University School of Medicine/Trustees of Indiana University<br/> <i>Grant / Contract Purpose:</i> Research</p> <p><i>Recipient Type:</i> Institution<br/> <i>Grant / Contract Description:</i><br/> <i>Additional Information:</i> I received funding from the CDC to Riley Hospital for Children in support of this work and that the funding was specifically for the work described in the paper</p> |                  |                  |

Additional Questions:

- Are there other relationships or activities that readers could perceive to have influenced, or that give the appearance of potentially influencing, what you wrote in the submitted work?**  
No.
- What is the manuscript title?**  
Effectiveness of BNT162b2 Vaccine Against Omicron Hospitalizations in Children and Adolescents
- Are you the corresponding author?**  
No.

Certification

I certify that the information provided in this disclosure is complete and accurate.

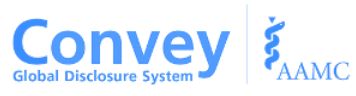

**Disclosure Purpose:** 22-02826

## Summary of Interests

| Company or Organization                                                                                                                                                             |                  |                                                                                                                   |
|-------------------------------------------------------------------------------------------------------------------------------------------------------------------------------------|------------------|-------------------------------------------------------------------------------------------------------------------|
| Entity                                                                                                                                                                              | Type             | Interest Held By                                                                                                  |
| <a href="#">Centers for Disease Control and Prevention</a>                                                                                                                          | Grant / Contract | Self                                                                                                              |
| <i>Recipient Name:</i> Nationwide Children's Hospital<br><i>Grant / Contract Description:</i> Funded by CDC, via subcontract through Boston Children's Hospital coordinating center |                  | <i>Recipient Type:</i> Institution<br><i>Grant / Contract Purpose:</i> Research<br><i>Additional Information:</i> |

## Additional Questions:

- Are there other relationships or activities that readers could perceive to have influenced, or that give the appearance of potentially influencing, what you wrote in the submitted work?**  
No.
- What is the manuscript title?**  
Effectiveness of BNT162b2 Vaccine Against Omicron Hospitalizations in Children and Adolescents
- Are you the corresponding author?**  
No.

## Certification

I certify that the information provided in this disclosure is complete and accurate.

**Disclosure Purpose:** 22-02826

## Summary of Interests

| Entity                                                                                                                                                                                             | Type             | Interest Held By                                                                                                  |
|----------------------------------------------------------------------------------------------------------------------------------------------------------------------------------------------------|------------------|-------------------------------------------------------------------------------------------------------------------|
| <b>Centers for Disease Control and Prevention</b>                                                                                                                                                  | Grant / Contract | Self                                                                                                              |
| <i>Recipient Name:</i> Baylor College of Medicine<br><i>Grant / Contract Description:</i> New Vaccine Surveillance Network<br><i>Additional Information:</i> effort supported by grant as local PI |                  | <i>Recipient Type:</i> Institution<br><i>Grant / Contract Purpose:</i> Other - public health surveillance         |
| <b>Centers for Disease Control and Prevention</b>                                                                                                                                                  | Grant / Contract | Self                                                                                                              |
| <i>Recipient Name:</i> Baylor College of Medicine<br><i>Grant / Contract Description:</i> Funded by CDC via subcontract through Boston Children's Hospital coordinating center                     |                  | <i>Recipient Type:</i> Institution<br><i>Grant / Contract Purpose:</i> Research<br><i>Additional Information:</i> |

## Additional Questions:

- Are there other relationships or activities that readers could perceive to have influenced, or that give the appearance of potentially influencing, what you wrote in the submitted work?**  
No.
- What is the manuscript title?**  
BNT162b2 Protection From Omicron Hospitalizations in Children and Adolescents
- Are you the corresponding author?**  
No.

## Certification

I certify that the information provided in this disclosure is complete and accurate.

**Disclosure Purpose:** 22-02826

## Summary of Interests

| Company or Organization                                                                                                                                                              |                  |                                                                                                                   |
|--------------------------------------------------------------------------------------------------------------------------------------------------------------------------------------|------------------|-------------------------------------------------------------------------------------------------------------------|
| Entity                                                                                                                                                                               | Type             | Interest Held By                                                                                                  |
| <a href="#">Boston Children's Hospital</a>                                                                                                                                           | Grant / Contract | Self                                                                                                              |
| <i>Recipient Name:</i> Children's Hospital New Orleans<br><i>Grant / Contract Description:</i> Funded by CDC, via subcontract through Boston Children's Hospital coordinating center |                  | <i>Recipient Type:</i> Institution<br><i>Grant / Contract Purpose:</i> Research<br><i>Additional Information:</i> |

## Additional Questions:

- Are there other relationships or activities that readers could perceive to have influenced, or that give the appearance of potentially influencing, what you wrote in the submitted work?**  
No.
- What is the manuscript title?**  
Effectiveness of BNT162b2 Vaccine against Critical COVID-19 in Adolescents
- Are you the corresponding author?**  
No.

## Certification

I certify that the information provided in this disclosure is complete and accurate.

Disclosure Purpose: 22-02826

Summary of Interests

**Company or Organization**

| Entity                                                                                                                                                                                      | Type             | Interest Held By                                                                                          |
|---------------------------------------------------------------------------------------------------------------------------------------------------------------------------------------------|------------------|-----------------------------------------------------------------------------------------------------------|
| Centers for Disease Control and Prevention                                                                                                                                                  | Grant / Contract | Self                                                                                                      |
| <i>Recipient Name:</i> Rady Children's Hospital/UC San Diego<br><i>Grant / Contract Description:</i> Funding specifically for work described in the paper<br><i>Additional Information:</i> |                  | <i>Recipient Type:</i> Institution<br><i>Grant / Contract Purpose:</i> Other - public health surveillance |

Additional Questions:

- Are there other relationships or activities that readers could perceive to have influenced, or that give the appearance of potentially influencing, what you wrote in the submitted work?**  
No.
- What is the manuscript title?**  
Effectiveness of BNT162b2 Vaccine against Critical COVID-19 in Adolescents
- Are you the corresponding author?**  
No.

Certification

I certify that the information provided in this disclosure is complete and accurate.

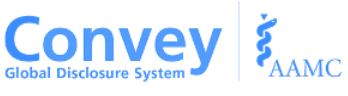

**Disclosure Purpose:** 22-02826

### Summary of Interests

I do not have any interests to disclose at this time.

### Additional Questions:

- Are there other relationships or activities that readers could perceive to have influenced, or that give the appearance of potentially influencing, what you wrote in the submitted work?**  
No.
- What is the manuscript title?**  
BNT162b2 Protection From Omicron Hospitalizations in Children and Adolescents
- Are you the corresponding author?**  
No.

### Certification

I certify that the information provided in this disclosure is complete and accurate.

Disclosure Purpose: 22-02826

Summary of Interests

**Company or Organization**

| Entity                                                                                                                                                                                                 | Type             | Interest Held By                                                                                                  |
|--------------------------------------------------------------------------------------------------------------------------------------------------------------------------------------------------------|------------------|-------------------------------------------------------------------------------------------------------------------|
| Centers for Disease Control and Prevention                                                                                                                                                             | Grant / Contract | Self                                                                                                              |
| <i>Recipient Name:</i> University of Miami Miller School of Medicine<br><i>Grant / Contract Description:</i> Funded by the CDC, via subcontract through Boston Children's Hospital coordinating center |                  | <i>Recipient Type:</i> Institution<br><i>Grant / Contract Purpose:</i> Research<br><i>Additional Information:</i> |

Additional Questions:

- Are there other relationships or activities that readers could perceive to have influenced, or that give the appearance of potentially influencing, what you wrote in the submitted work?  
No.
- What is the manuscript title?  
Effectiveness of BNT162b2 Vaccine Against Omicron Hospitalizations in Children and Adolescents
- Are you the corresponding author?  
No.

Certification

I certify that the information provided in this disclosure is complete and accurate.

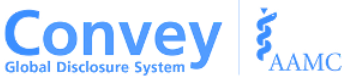

**Disclosure Purpose:** 22-02826

## Summary of Interests

| Company or Organization                                                                                                                                                                      |                  |                                                                                                                   |
|----------------------------------------------------------------------------------------------------------------------------------------------------------------------------------------------|------------------|-------------------------------------------------------------------------------------------------------------------|
| Entity                                                                                                                                                                                       | Type             | Interest Held By                                                                                                  |
| <a href="#">Centers for Disease Control and Prevention</a>                                                                                                                                   | Grant / Contract | Self                                                                                                              |
| <i>Recipient Name:</i> Children's Hospital of Philadelphia<br><i>Grant / Contract Description:</i> Funded by the CDC, via subcontract through Boston Children's Hospital coordinating center |                  | <i>Recipient Type:</i> Institution<br><i>Grant / Contract Purpose:</i> Research<br><i>Additional Information:</i> |

## Additional Questions:

- Are there other relationships or activities that readers could perceive to have influenced, or that give the appearance of potentially influencing, what you wrote in the submitted work?**  
No.
- What is the manuscript title?**  
Effectiveness of BNT162b2 Vaccine Against Omicron Hospitalizations in Children and Adolescents
- Are you the corresponding author?**  
No.

## Certification

I certify that the information provided in this disclosure is complete and accurate.



Disclosure Purpose: 22-02826

Summary of Interests

**Company or Organization**

| Entity                                                                                                                                               | Type             | Interest Held By                                                                |
|------------------------------------------------------------------------------------------------------------------------------------------------------|------------------|---------------------------------------------------------------------------------|
| Centers for Disease Control and Prevention                                                                                                           | Grant / Contract | Self                                                                            |
| <i>Recipient Name:</i> Ann & Robert H Lurie Children's Hospital of Chicago<br><i>Grant / Contract Description:</i><br><i>Additional Information:</i> |                  | <i>Recipient Type:</i> Institution<br><i>Grant / Contract Purpose:</i> Research |

Additional Questions:

- Are there other relationships or activities that readers could perceive to have influenced, or that give the appearance of potentially influencing, what you wrote in the submitted work?**  
No.
- What is the manuscript title?**  
Effectiveness of BNT162b2 Vaccine Against Omicron Hospitalizations in Children and Adolescents
- Are you the corresponding author?**  
No.

Certification

I certify that the information provided in this disclosure is complete and accurate.

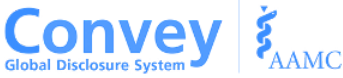

**Disclosure Purpose:** 22-02826

## Summary of Interests

| Entity                                                                                                                                                                                                                                                                                           | Type             | Interest Held By                                                                |
|--------------------------------------------------------------------------------------------------------------------------------------------------------------------------------------------------------------------------------------------------------------------------------------------------|------------------|---------------------------------------------------------------------------------|
| <b>Centers for Disease Control and Prevention</b>                                                                                                                                                                                                                                                | Grant / Contract | Self                                                                            |
| <i>Recipient Name:</i> University of Nebraska<br><i>Grant / Contract Description:</i> Payment for the work that lead to the paper<br><i>Additional Information:</i>                                                                                                                              |                  | <i>Recipient Type:</i> Institution<br><i>Grant / Contract Purpose:</i> Research |
| <b>NIH Clinical Center</b>                                                                                                                                                                                                                                                                       | Grant / Contract | Self                                                                            |
| <i>Recipient Name:</i> University of Nebraska<br><i>Grant / Contract Description:</i> Subcontract of NIH funding to study influenza<br><i>Additional Information:</i> Given clinical similarities some of the work done for this sub-contract on the grant helped lead to the data in this paper |                  | <i>Recipient Type:</i> Institution<br><i>Grant / Contract Purpose:</i> Research |

## Additional Questions:

- Are there other relationships or activities that readers could perceive to have influenced, or that give the appearance of potentially influencing, what you wrote in the submitted work?**  
No.
- What is the manuscript title?**  
Effectiveness of BNT162b2 Vaccine Against Omicron Hospitalizations in Children and Adolescents
- Are you the corresponding author?**  
No.

## Certification

I certify that the information provided in this disclosure is complete and accurate.

**Disclosure Purpose:** 22-02826

## Summary of Interests

| Company or Organization                                                                                                                                                                               |                  |                                                                                                                   |
|-------------------------------------------------------------------------------------------------------------------------------------------------------------------------------------------------------|------------------|-------------------------------------------------------------------------------------------------------------------|
| Entity                                                                                                                                                                                                | Type             | Interest Held By                                                                                                  |
| <a href="#">Centers for Disease Control and Prevention</a>                                                                                                                                            | Grant / Contract | Self                                                                                                              |
| <i>Recipient Name:</i> University of California San Francisco<br><i>Grant / Contract Description:</i> A public health study of COVID-19 vaccine effectiveness in preventing severe pediatric COVID-19 |                  | <i>Recipient Type:</i> Institution<br><i>Grant / Contract Purpose:</i> Research<br><i>Additional Information:</i> |

## Additional Questions:

- Are there other relationships or activities that readers could perceive to have influenced, or that give the appearance of potentially influencing, what you wrote in the submitted work?**  
No.
- What is the manuscript title?**  
Effectiveness of BNT162b2 Vaccine against Omicron Hospitalizations in Children and Adolescents
- Are you the corresponding author?**  
No.

## Certification

I certify that the information provided in this disclosure is complete and accurate.

**Disclosure Purpose:** 22-02826

## Summary of Interests

| Company or Organization                                                                                                       |            |                                                                   |
|-------------------------------------------------------------------------------------------------------------------------------|------------|-------------------------------------------------------------------|
| Entity                                                                                                                        | Type       | Interest Held By                                                  |
| <a href="#">AerogenPharma</a>                                                                                                 | Consultant | Self                                                              |
| <i>Category:</i> Consultant<br><i>Additional Information:</i> Unfunded                                                        |            | <i>Description:</i> Scientific consultant for product development |
| <a href="#">Lucira Health</a>                                                                                                 | Consultant | Self                                                              |
| <i>Category:</i> Consultant<br><i>Additional Information:</i> One time reimbursement for virtual advisory board participation |            | <i>Description:</i> Virtual Advisory Board Member                 |

## Additional Questions:

- Are there other relationships or activities that readers could perceive to have influenced, or that give the appearance of potentially influencing, what you wrote in the submitted work?**  
No.
- What is the manuscript title?**  
Effectiveness of BNT162b2 Vaccine against Critical COVID-19 in Adolescents
- Are you the corresponding author?**  
No.

## Certification

I certify that the information provided in this disclosure is complete and accurate.

Disclosure Purpose: 22-02826

Summary of Interests

**Company or Organization**

| Entity                                                                                                                                                                             | Type             | Interest Held By                                                                                                  |
|------------------------------------------------------------------------------------------------------------------------------------------------------------------------------------|------------------|-------------------------------------------------------------------------------------------------------------------|
| Centers for Disease Control and Prevention                                                                                                                                         | Grant / Contract | Self                                                                                                              |
| <i>Recipient Name:</i> Saint Barnabas Medical Center<br><i>Grant / Contract Description:</i> Funded by CDC, via subcontract through Boston Children's Hospital coordinating center |                  | <i>Recipient Type:</i> Institution<br><i>Grant / Contract Purpose:</i> Research<br><i>Additional Information:</i> |

Additional Questions:

- Are there other relationships or activities that readers could perceive to have influenced, or that give the appearance of potentially influencing, what you wrote in the submitted work?  
No.
- What is the manuscript title?  
Effectiveness of BNT162b2 Vaccine Against Omicron Hospitalizations in Children and Adolescents
- Are you the corresponding author?  
No.

Certification

I certify that the information provided in this disclosure is complete and accurate.

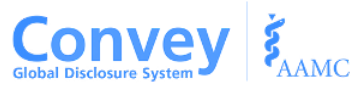

Disclosure Purpose: 22-02826

Summary of Interests

**Company or Organization**

| Entity                                                                                                                                | Type             | Interest Held By                                                                |
|---------------------------------------------------------------------------------------------------------------------------------------|------------------|---------------------------------------------------------------------------------|
| <b>Centers for Disease Control and Prevention</b>                                                                                     | Grant / Contract | Self                                                                            |
| <i>Recipient Name:</i> Vanderbilt University Medical Center<br><i>Grant / Contract Description:</i><br><i>Additional Information:</i> |                  | <i>Recipient Type:</i> Institution<br><i>Grant / Contract Purpose:</i> Research |
| <b>SANOPI PASTEUR INC.</b>                                                                                                            | Grant / Contract | Self                                                                            |
| <i>Recipient Name:</i> Vanderbilt University Medical Center<br><i>Grant / Contract Description:</i><br><i>Additional Information:</i> |                  | <i>Recipient Type:</i> Institution<br><i>Grant / Contract Purpose:</i> Research |

Additional Questions:

- Are there other relationships or activities that readers could perceive to have influenced, or that give the appearance of potentially influencing, what you wrote in the submitted work?**  
No.
- What is the manuscript title?**  
Effectiveness of BNT162b2 Vaccine Against Omicron Hospitalizations in Children and Adolescents"
- Are you the corresponding author?**  
No.

Certification

I certify that the information provided in this disclosure is complete and accurate.

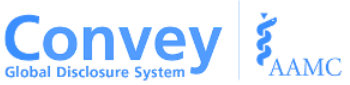

Disclosure Purpose: 22-02826

Summary of Interests

**Company or Organization**

| Entity                                                                                                                                                                                   | Type             | Interest Held By                                                                |
|------------------------------------------------------------------------------------------------------------------------------------------------------------------------------------------|------------------|---------------------------------------------------------------------------------|
| Centers for Disease Control and Prevention                                                                                                                                               | Grant / Contract | Self                                                                            |
| <i>Recipient Name:</i> Central MI University<br><i>Grant / Contract Description:</i> Funded by CDC, via subcontract through Boston Children's Hospital<br><i>Additional Information:</i> |                  | <i>Recipient Type:</i> Institution<br><i>Grant / Contract Purpose:</i> Research |

Additional Questions:

- Are there other relationships or activities that readers could perceive to have influenced, or that give the appearance of potentially influencing, what you wrote in the submitted work?**  
No.
- What is the manuscript title?**  
Effectiveness of BNT162b2 Vaccine Against Omicron Hospitalizations in Children and Adolescents
- Are you the corresponding author?**  
No.

Certification

I certify that the information provided in this disclosure is complete and accurate.

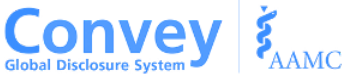

Disclosure Purpose: 22-02826

Summary of Interests

**Company or Organization**

| Entity                                                                                                                                                                                                                                                        | Type             | Interest Held By                                                                                          |
|---------------------------------------------------------------------------------------------------------------------------------------------------------------------------------------------------------------------------------------------------------------|------------------|-----------------------------------------------------------------------------------------------------------|
| BioFire Diagnostics, LLC                                                                                                                                                                                                                                      | Consultant       | Self                                                                                                      |
| <i>Category:</i> Consultant<br><i>Additional Information:</i>                                                                                                                                                                                                 |                  | <i>Description:</i> Consultant-lecturer                                                                   |
| Centers for Disease Control and Prevention                                                                                                                                                                                                                    | Grant / Contract | Self                                                                                                      |
| <i>Recipient Name:</i> University of Mississippi Medical Center<br><i>Grant / Contract Description:</i><br><i>Additional Information:</i>                                                                                                                     |                  | <i>Recipient Type:</i> Institution<br><i>Grant / Contract Purpose:</i> Other - public health surveillance |
| Dynamed                                                                                                                                                                                                                                                       | Other            | Self                                                                                                      |
| <i>Category:</i> Other<br><i>Additional Information:</i> have been working with DYNAMED since 2018, the above refers to renewed contract. DYNAMED is similar to Up to Date, but writers/editors/medical consultants are NOT awarded by content access/viewed. |                  | <i>Description:</i> "triage" of articles that are added for content to Dynamed.com                        |

Additional Questions:

- Are there other relationships or activities that readers could perceive to have influenced, or that give the appearance of potentially influencing, what you wrote in the submitted work?**  
No.
- What is the manuscript title?**  
Effectiveness of BNT162b2 Vaccine Against Omicron Hospitalizations in Children and Adolescents
- Are you the corresponding author?**  
No.

Certification

I certify that the information provided in this disclosure is complete and accurate.



Disclosure Purpose: 22-02826

Summary of Interests

**Company or Organization**

| Entity                                                                                                                                                                       | Type             | Interest Held By                                                                                                  |
|------------------------------------------------------------------------------------------------------------------------------------------------------------------------------|------------------|-------------------------------------------------------------------------------------------------------------------|
| Centers for Disease Control and Prevention                                                                                                                                   | Grant / Contract | Self                                                                                                              |
| <i>Recipient Name:</i> University of Minnesota<br><i>Grant / Contract Description:</i> Funded by CDC, via subcontract through Boston Children's Hospital coordinating center |                  | <i>Recipient Type:</i> Institution<br><i>Grant / Contract Purpose:</i> Research<br><i>Additional Information:</i> |

Additional Questions:

- Are there other relationships or activities that readers could perceive to have influenced, or that give the appearance of potentially influencing, what you wrote in the submitted work?  
No.
- What is the manuscript title?  
Effectiveness of BNT162b2 Vaccine Against Omicron Hospitalizations in Children and Adolescents
- Are you the corresponding author?  
No.

Certification

I certify that the information provided in this disclosure is complete and accurate.

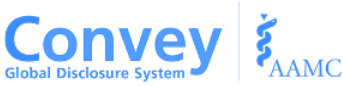

Disclosure Purpose: 22-02826

Summary of Interests

**Company or Organization**

| Entity                                                                                                                                                                         | Type             | Interest Held By                                                                                          |
|--------------------------------------------------------------------------------------------------------------------------------------------------------------------------------|------------------|-----------------------------------------------------------------------------------------------------------|
| Centers for Disease Control and Prevention                                                                                                                                     | Grant / Contract | Self                                                                                                      |
| <i>Recipient Name:</i> Arkansas Children's Research Institute<br><i>Grant / Contract Description:</i> Overcoming COVID<br><i>Additional Information:</i> Institutional Support |                  | <i>Recipient Type:</i> Institution<br><i>Grant / Contract Purpose:</i> Other - Public health surveillance |

Additional Questions:

- Are there other relationships or activities that readers could perceive to have influenced, or that give the appearance of potentially influencing, what you wrote in the submitted work?**  
No.
- What is the manuscript title?**  
Effectiveness of BNT162b2 Vaccine against Critical COVID-19 in Adolescents
- Are you the corresponding author?**  
No.

Certification

I certify that the information provided in this disclosure is complete and accurate.

Disclosure Purpose: 22-02826

Summary of Interests

| Company or Organization                                                                                                                                                                |                  |                                                                                                                   |
|----------------------------------------------------------------------------------------------------------------------------------------------------------------------------------------|------------------|-------------------------------------------------------------------------------------------------------------------|
| Entity                                                                                                                                                                                 | Type             | Interest Held By                                                                                                  |
| <b>Centers for Disease Control and Prevention</b>                                                                                                                                      | Grant / Contract | Self                                                                                                              |
| <i>Recipient Name:</i> Emory University<br><i>Grant / Contract Description:</i> Funds specifically for the work described in the current manuscript.<br><i>Additional Information:</i> |                  | <i>Recipient Type:</i> Institution<br><i>Grant / Contract Purpose:</i> Research                                   |
| <b>Janssen Pharmaceuticals, Inc</b>                                                                                                                                                    | Grant / Contract | Self                                                                                                              |
| <i>Recipient Name:</i> Emory University<br><i>Grant / Contract Description:</i> Funds from NIH for his work as a co-investigator on clinical trials of Janssen COVID-19 vaccine        |                  | <i>Recipient Type:</i> Institution<br><i>Grant / Contract Purpose:</i> Research<br><i>Additional Information:</i> |
| <b>Moderna</b>                                                                                                                                                                         | Grant / Contract | Self                                                                                                              |
| <i>Recipient Name:</i> Emory University<br><i>Grant / Contract Description:</i> Funds from NIH for his work as a co-investigator on clinical trials of Moderna COVID-19 vaccine        |                  | <i>Recipient Type:</i> Institution<br><i>Grant / Contract Purpose:</i> Research<br><i>Additional Information:</i> |
| <b>Pfizer</b>                                                                                                                                                                          | Grant / Contract | Self                                                                                                              |
| <i>Recipient Name:</i> Emory University<br><i>Grant / Contract Description:</i> Funds from Pfizer for his work as a co-investigator on clinical trials of Pfizer COVID-19 vaccine.     |                  | <i>Recipient Type:</i> Institution<br><i>Grant / Contract Purpose:</i> Research<br><i>Additional Information:</i> |

Additional Questions:

- Are there other relationships or activities that readers could perceive to have influenced, or that give the appearance of potentially influencing, what you wrote in the submitted work?**  
No.
- What is the manuscript title?**  
Effectiveness of BNT162b2 Vaccine Against Omicron Hospitalizations in Children and Adolescents
- Are you the corresponding author?**  
No.

Certification

I certify that the information provided in this disclosure is complete and accurate.

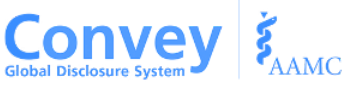

Disclosure Purpose: 22-02826

Summary of Interests

**Company or Organization**

| Entity                                                                                                                                                   | Type             | Interest Held By                                                                                                  |
|----------------------------------------------------------------------------------------------------------------------------------------------------------|------------------|-------------------------------------------------------------------------------------------------------------------|
| <a href="#">Centers for Disease Control and Prevention</a>                                                                                               | Grant / Contract | Self                                                                                                              |
| <i>Recipient Name:</i> UAB<br><i>Grant / Contract Description:</i> Funded by CDC, via subcontract through Boston Children's Hospital Coordinating Center |                  | <i>Recipient Type:</i> Institution<br><i>Grant / Contract Purpose:</i> Research<br><i>Additional Information:</i> |

Additional Questions:

- Are there other relationships or activities that readers could perceive to have influenced, or that give the appearance of potentially influencing, what you wrote in the submitted work?**  
No.
- What is the manuscript title?**  
Effectiveness of BNT162b2 Vaccine Against Omicron Hospitalizations in Children and Adolescents
- Are you the corresponding author?**  
No.

Certification

I certify that the information provided in this disclosure is complete and accurate.



Disclosure Purpose: 22-02826

Summary of Interests

**Company or Organization**

| Entity                                                                                                                         | Type             | Interest Held By                                                                                          |
|--------------------------------------------------------------------------------------------------------------------------------|------------------|-----------------------------------------------------------------------------------------------------------|
| Centers for Disease Control and Prevention                                                                                     | Grant / Contract | Self                                                                                                      |
| <i>Recipient Name:</i> Mayo Clinic<br><i>Grant / Contract Description:</i> 75D30120C07725-01<br><i>Additional Information:</i> |                  | <i>Recipient Type:</i> Institution<br><i>Grant / Contract Purpose:</i> Other - public health surveillance |
| Division of Intramural Research, National Institute of Allergy and Infectious Diseases                                         | Grant / Contract | Self                                                                                                      |
| <i>Recipient Name:</i> Mayo Clinic<br><i>Grant / Contract Description:</i> AI144301-01<br><i>Additional Information:</i>       |                  | <i>Recipient Type:</i> Institution<br><i>Grant / Contract Purpose:</i> Research                           |

Additional Questions:

- Are there other relationships or activities that readers could perceive to have influenced, or that give the appearance of potentially influencing, what you wrote in the submitted work?  
No.
- What is the manuscript title?  
Effectiveness of BNT162b2 Vaccine Against Omicron Hospitalizations in Children and Adolescents
- Are you the corresponding author?  
No.

Certification

I certify that the information provided in this disclosure is complete and accurate.

Disclosure Purpose: 22-02826

Summary of Interests

**Company or Organization**

| Entity                                                                                                                                                                                | Type             | Interest Held By                                                                                                  |
|---------------------------------------------------------------------------------------------------------------------------------------------------------------------------------------|------------------|-------------------------------------------------------------------------------------------------------------------|
| <a href="#">Centers for Disease Control and Prevention</a>                                                                                                                            | Grant / Contract | Self                                                                                                              |
| <i>Recipient Name:</i> University of Texas Southwestern<br><i>Grant / Contract Description:</i> Funded by CDC, via subcontract through Boston Children's Hospital coordinating center |                  | <i>Recipient Type:</i> Institution<br><i>Grant / Contract Purpose:</i> Research<br><i>Additional Information:</i> |

Additional Questions:

- Are there other relationships or activities that readers could perceive to have influenced, or that give the appearance of potentially influencing, what you wrote in the submitted work?**  
No.
- What is the manuscript title?**  
Effectiveness of BNT162b2 Vaccine Against Omicron Hospitalizations in Children and Adolescents
- Are you the corresponding author?**  
No.

Certification

I certify that the information provided in this disclosure is complete and accurate.

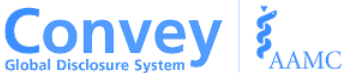

**Disclosure Purpose:** 22-02826

Summary of Interests

**Company or Organization**

| Entity                                                                                                                                                                                                                                                    | Type             | Interest Held By                                                                |
|-----------------------------------------------------------------------------------------------------------------------------------------------------------------------------------------------------------------------------------------------------------|------------------|---------------------------------------------------------------------------------|
| <a href="#">Centers for Disease Control and Prevention</a>                                                                                                                                                                                                | Grant / Contract | Self                                                                            |
| <i>Recipient Name:</i> MUSC<br><i>Grant / Contract Description:</i><br><i>Additional Information:</i> received funding from the CDC to your institution in support of this work and that was the funding specifically for the work described in the paper |                  | <i>Recipient Type:</i> Institution<br><i>Grant / Contract Purpose:</i> Research |

Additional Questions:

- Are there other relationships or activities that readers could perceive to have influenced, or that give the appearance of potentially influencing, what you wrote in the submitted work?**  
No.
- What is the manuscript title?**  
Effectiveness of BNT162b2 Vaccine against Critical COVID-19 in Adolescents
- Are you the corresponding author?**  
No.

Certification

I certify that the information provided in this disclosure is complete and accurate.

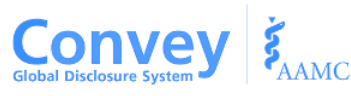

Disclosure Purpose: 22-02826

Summary of Interests

**Company or Organization**

| Entity                                                                                                                                                                                         | Type             | Interest Held By                                                                                                                                                                                   |
|------------------------------------------------------------------------------------------------------------------------------------------------------------------------------------------------|------------------|----------------------------------------------------------------------------------------------------------------------------------------------------------------------------------------------------|
| <a href="#">Centers for Disease Control and Prevention</a>                                                                                                                                     | Grant / Contract | Self                                                                                                                                                                                               |
| <i>Recipient Name:</i> University of Colorado School of Medicine<br><i>Grant / Contract Description:</i> Funded by CDC, via subcontract through Boston Children's Hospital coordinating center |                  | <i>Recipient Type:</i> Institution<br><i>Grant / Contract Purpose:</i> Research<br><i>Additional Information:</i> Funding from the CDC was specifically for the work described in this manuscript. |

Additional Questions:

- Are there other relationships or activities that readers could perceive to have influenced, or that give the appearance of potentially influencing, what you wrote in the submitted work?**  
No.
- What is the manuscript title?**  
Effectiveness of BNT162b2 Vaccine Against Omicron Hospitalizations in Children and Adolescents
- Are you the corresponding author?**  
No.

Certification

I certify that the information provided in this disclosure is complete and accurate.

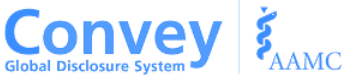



**Disclosure Purpose:** 22-02826

## Summary of Interests

**Company or Organization**

| Entity                                                     | Type             | Interest Held By |
|------------------------------------------------------------|------------------|------------------|
| <a href="#">Centers for Disease Control and Prevention</a> | Grant / Contract | Self             |

*Recipient Name:* Boston Children's Hospital  
*Grant / Contract Description:* 75D30121C10297  
*Additional Information:*

*Recipient Type:* Institution  
*Grant / Contract Purpose:* Research

## Additional Questions:

- Are there other relationships or activities that readers could perceive to have influenced, or that give the appearance of potentially influencing, what you wrote in the submitted work?**  
No.
- What is the manuscript title?**  
Effectiveness of BNT162b2 Vaccine Against Omicron Hospitalizations in Children and Adolescents
- Are you the corresponding author?**  
No.

## Certification

I certify that the information provided in this disclosure is complete and accurate.

Disclosure Purpose: 22-02826

Summary of Interests

**Company or Organization**

| Entity                                                                                                                                                                                                | Type             | Interest Held By                                                                                                  |
|-------------------------------------------------------------------------------------------------------------------------------------------------------------------------------------------------------|------------------|-------------------------------------------------------------------------------------------------------------------|
| Centers for Disease Control and Prevention                                                                                                                                                            | Grant / Contract | Self                                                                                                              |
| <i>Recipient Name:</i> Akron Children's Hospital Research Institute<br><i>Grant / Contract Description:</i> Funded by the CDC, via subcontract through Boston Children's Hospital coordinating center |                  | <i>Recipient Type:</i> Institution<br><i>Grant / Contract Purpose:</i> Research<br><i>Additional Information:</i> |

Additional Questions:

- Are there other relationships or activities that readers could perceive to have influenced, or that give the appearance of potentially influencing, what you wrote in the submitted work?  
No.
- What is the manuscript title?  
Effectiveness of BNT162b2 Vaccine Against Omicron Hospitalizations in Children and Adolescents
- Are you the corresponding author?  
No.

Certification

I certify that the information provided in this disclosure is complete and accurate.



**Disclosure Purpose:** 22-02826

**Summary of Interests**

I do not have any interests to disclose at this time.

**Additional Questions:**

- Are there other relationships or activities that readers could perceive to have influenced, or that give the appearance of potentially influencing, what you wrote in the submitted work?**  
No.
- What is the manuscript title?**  
Effectiveness of BNT162b2 Vaccine Against Omicron Hospitalizations in Children and Adolescents
- Are you the corresponding author?**  
No.

**Certification**

I certify that the information provided in this disclosure is complete and accurate.

Disclosure Purpose: 22-02826

Summary of Interests

Company or Organization

| Entity                                                                                                                                                                                                               | Type             | Interest Held By                                                                                                  |
|----------------------------------------------------------------------------------------------------------------------------------------------------------------------------------------------------------------------|------------------|-------------------------------------------------------------------------------------------------------------------|
| <a href="#">AstraZeneca</a>                                                                                                                                                                                          | Grant / Contract | Self                                                                                                              |
| <i>Recipient Name:</i> Children's Hospital Los Angeles<br><i>Grant / Contract Description:</i> RSV studies<br><i>Additional Information:</i>                                                                         |                  | <i>Recipient Type:</i> Institution<br><i>Grant / Contract Purpose:</i> Research                                   |
| <a href="#">Centers for Disease Control and Prevention</a>                                                                                                                                                           | Grant / Contract | Self                                                                                                              |
| <i>Recipient Name:</i> Children's Hospital Los Angeles<br><i>Grant / Contract Description:</i> COVID-19 Vaccine Effectiveness Study - Support for work described in the manuscript<br><i>Additional Information:</i> |                  | <i>Recipient Type:</i> Institution<br><i>Grant / Contract Purpose:</i> Research<br><i>Additional Information:</i> |
| <a href="#">National Institutes of Health</a>                                                                                                                                                                        | Grant / Contract | Self                                                                                                              |
| <i>Recipient Name:</i> Children's Hospital Los Angeles<br><i>Grant / Contract Description:</i><br><i>Additional Information:</i>                                                                                     |                  | <i>Recipient Type:</i> Institution<br><i>Grant / Contract Purpose:</i> Research                                   |
| <a href="#">Pfizer</a>                                                                                                                                                                                               | Grant / Contract | Self                                                                                                              |
| <i>Recipient Name:</i> Children's Hospital Los Angeles<br><i>Grant / Contract Description:</i> Pneumococcus studies<br><i>Additional Information:</i>                                                                |                  | <i>Recipient Type:</i> Institution<br><i>Grant / Contract Purpose:</i> Research                                   |
| <a href="#">SANOFI PASTEUR INC.</a>                                                                                                                                                                                  | Consultant       | Self                                                                                                              |
| <i>Category:</i> Consultant<br><i>Additional Information:</i>                                                                                                                                                        |                  | <i>Description:</i>                                                                                               |
| <a href="#">Seqirus USA Inc</a>                                                                                                                                                                                      | Consultant       | Self                                                                                                              |
| <i>Category:</i> Consultant<br><i>Additional Information:</i>                                                                                                                                                        |                  | <i>Description:</i>                                                                                               |

Additional Questions:

- Are there other relationships or activities that readers could perceive to have influenced, or that give the appearance of potentially influencing, what you wrote in the submitted work?  
No.
- What is the manuscript title?  
BNT162b2 Protection From Omicron Hospitalizations in Children and Adolescents
- Are you the corresponding author?  
No.

Certification

I certify that the information provided in this disclosure is complete and accurate.

**Disclosure Purpose:** 22-02826

### Summary of Interests

I do not have any interests to disclose at this time.

### Additional Questions:

1. **Are there other relationships or activities that readers could perceive to have influenced, or that give the appearance of potentially influencing, what you wrote in the submitted work?**

No.

2. **What is the manuscript title?**

Effectiveness of BNT162b2 Vaccine Against Omicron Hospitalizations in Children and Adolescents

3. **Are you the corresponding author?**

Yes.

a. **Please list the other authors' names here.**

Ashley M. Price, MPH1,\*; Samantha M. Olson, MPH1,\*; Margaret M. Newhams, MPH2; Natasha B. Halasa, MD3; Julie A. Boom, MD4; Leila C. Sahni, PhD, MPH4; Pia S. Pannaraj, MD, MPH5; Katherine Irby, MD6; Katherine E. Bline, MD7; Aline B. Maddux, MD8; Ryan A. Nofziger, MD9; Melissa A. Cameron, MD10; Tracie C. Walker, MD11; Stephanie P. Schwartz, MD11; Elizabeth H. Mack, MD12; Laura Smallcomb, MD13; Jennifer E. Schuster, MD14; Charlotte V. Hobbs, MD15; Satoshi Kamidani, MD16; Keiko M. Tarquinio17; Tamara T. Bradford, MD18; Emily R. Levy, MD19; Kathleen Chiotos, MD, MSCE20; Samina S. Bhumbra, MD21; Natalie Z. Cvijanovich, MD22; Sabrina M. Heidemann, MD23; Melissa L. Cullimore, MD24; Shira J. Gertz, MD25; Bria M. Coates, MD26; Mary A. Staat, MD27; Matt S. Zinter, MD28; Michele Kong, MD29; Brandon M. Chatani, MD30; Janet R. Hume, MD31; Katri V. Typpo, MD, MPH32; Mia Maamari, MD33; Heidi R. Flori, MD34; Mark W. Tenforde, MD, PhD1; Laura D. Zambrano, PhD, MPH1; Angela P. Campbell, MD, MPH1; Manish M. Patel, MD1,\*; Adrienne G. Randolph, MD

### Certification

I certify that the information provided in this disclosure is complete and accurate.

**Disclosure Purpose:** 22-02826

Summary of Interests

I do not have any interests to disclose at this time.

Additional Questions:

- 1. **Are there other relationships or activities that readers could perceive to have influenced, or that give the appearance of potentially influencing, what you wrote in the submitted work?**  
No.
- 2. **What is the manuscript title?**  
Effectiveness of BNT162b2 Vaccine Against Omicron Hospitalizations in Children and Adolescents
- 3. **Are you the corresponding author?**  
No.

Certification

I certify that the information provided in this disclosure is complete and accurate.

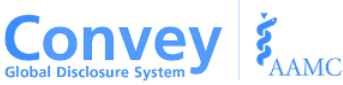

Disclosure Purpose: 22-02826

Summary of Interests

**Company or Organization**

| Entity                                                                                                                                                                          | Type             | Interest Held By                                                                                                                            |
|---------------------------------------------------------------------------------------------------------------------------------------------------------------------------------|------------------|---------------------------------------------------------------------------------------------------------------------------------------------|
| <a href="#">Centers for Disease Control and Prevention</a>                                                                                                                      | Grant / Contract | Self                                                                                                                                        |
| <i>Recipient Name:</i> Boston Children's Hospital<br><i>Grant / Contract Description:</i> Contract for investigating COVID-19 vaccine effectiveness in children and adolescents |                  | <i>Recipient Type:</i> Institution<br><i>Grant / Contract Purpose:</i> Other - Public Health Surveillance<br><i>Additional Information:</i> |

Additional Questions:

- Are there other relationships or activities that readers could perceive to have influenced, or that give the appearance of potentially influencing, what you wrote in the submitted work?**  
No.
- What is the manuscript title?**  
Effectiveness of BNT162b2 Vaccine Against Omicron Hospitalizations in Children and Adolescents
- Are you the corresponding author?**  
No.

Certification

I certify that the information provided in this disclosure is complete and accurate.

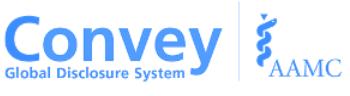

Disclosure Purpose: 22-02826

Summary of Interests

**Company or Organization**

| Entity                                                                                                                                                                                                 | Type             | Interest Held By                                                                                                                                                                             |
|--------------------------------------------------------------------------------------------------------------------------------------------------------------------------------------------------------|------------------|----------------------------------------------------------------------------------------------------------------------------------------------------------------------------------------------|
| Centers for Disease Control and Prevention                                                                                                                                                             | Grant / Contract | Self                                                                                                                                                                                         |
| <i>Recipient Name:</i> Baylor College of Medicine<br><i>Grant / Contract Description:</i> Funded by CDC, via subcontract through Boston Children's Hospital coordinating center                        |                  | <i>Recipient Type:</i> Institution<br><i>Grant / Contract Purpose:</i> Research<br><i>Additional Information:</i> Contract to conduct subject enrollment through Overcoming COVID-19 network |
| Centers for Disease Control and Prevention                                                                                                                                                             | Grant / Contract | Self                                                                                                                                                                                         |
| <i>Recipient Name:</i> Baylor College of Medicine<br><i>Grant / Contract Description:</i> New Vaccine Surveillance Network<br><i>Additional Information:</i> Effort to support activities as local PI. |                  | <i>Recipient Type:</i> Institution<br><i>Grant / Contract Purpose:</i> Other - Public health surveillance                                                                                    |

Additional Questions:

- Are there other relationships or activities that readers could perceive to have influenced, or that give the appearance of potentially influencing, what you wrote in the submitted work?**  
No.
- What is the manuscript title?**  
BNT162b2 Protection From Omicron Hospitalizations in Children and Adolescents
- Are you the corresponding author?**  
No.

Certification

I certify that the information provided in this disclosure is complete and accurate.



Disclosure Purpose: 22-02826

Summary of Interests

**Company or Organization**

| Entity                                                                                                                                                                                          | Type             | Interest Held By                                                                |
|-------------------------------------------------------------------------------------------------------------------------------------------------------------------------------------------------|------------------|---------------------------------------------------------------------------------|
| <a href="#">Centers for Disease Control and Prevention</a>                                                                                                                                      | Grant / Contract | Self                                                                            |
| <i>Recipient Name:</i> Children's Mercy Kansas City<br><i>Grant / Contract Description:</i> Funded by CDC, via subcontract through Boston Children's Hospital<br><i>Additional Information:</i> |                  | <i>Recipient Type:</i> Institution<br><i>Grant / Contract Purpose:</i> Research |
| <a href="#">Merck</a>                                                                                                                                                                           | Grant / Contract | Self                                                                            |
| <i>Recipient Name:</i> Children's Mercy Kansas City<br><i>Grant / Contract Description:</i> RSV monoclonal antibody clinical trial<br><i>Additional Information:</i>                            |                  | <i>Recipient Type:</i> Institution<br><i>Grant / Contract Purpose:</i> Research |

Additional Questions:

- Are there other relationships or activities that readers could perceive to have influenced, or that give the appearance of potentially influencing, what you wrote in the submitted work?**  
No.
- What is the manuscript title?**  
Effectiveness of BNT162b2 Vaccine Against Omicron Hospitalizations in Children and Adolescents
- Are you the corresponding author?**  
No.

Certification

I certify that the information provided in this disclosure is complete and accurate.

**Disclosure Purpose:** 22-02826

## Summary of Interests

| Company or Organization                                                                                                                                                                          |                  |                                                                                                                   |
|--------------------------------------------------------------------------------------------------------------------------------------------------------------------------------------------------|------------------|-------------------------------------------------------------------------------------------------------------------|
| Entity                                                                                                                                                                                           | Type             | Interest Held By                                                                                                  |
| <a href="#">Centers for Disease Control and Prevention</a>                                                                                                                                       | Grant / Contract | Self                                                                                                              |
| <i>Recipient Name:</i> University of North Carolina at Chapel Hill<br><i>Grant / Contract Description:</i> Funded by CDC, via subcontract through Boston Children's Hospital Coordinating Center |                  | <i>Recipient Type:</i> Institution<br><i>Grant / Contract Purpose:</i> Research<br><i>Additional Information:</i> |

## Additional Questions:

- Are there other relationships or activities that readers could perceive to have influenced, or that give the appearance of potentially influencing, what you wrote in the submitted work?**  
No.
- What is the manuscript title?**  
Effectiveness of BNT162b2 Vaccine Against Omicron Hospitalizations in Children and Adolescents
- Are you the corresponding author?**  
No.

## Certification

I certify that the information provided in this disclosure is complete and accurate.



**Disclosure Purpose:** 22-02826

**Summary of Interests**

I do not have any interests to disclose at this time.

**Additional Questions:**

- 1. **Are there other relationships or activities that readers could perceive to have influenced, or that give the appearance of potentially influencing, what you wrote in the submitted work?**  
No.
- 2. **What is the manuscript title?**  
Effectiveness of BNT162b2 Vaccine Against Omicron Hospitalizations in U.S. Children
- 3. **Are you the corresponding author?**  
No.

**Certification**

I certify that the information provided in this disclosure is complete and accurate.



Disclosure Purpose: 22-02826

Summary of Interests

**Company or Organization**

| Entity                                                   | Type  | Interest Held By                                                                                          |
|----------------------------------------------------------|-------|-----------------------------------------------------------------------------------------------------------|
| Centers for Disease Control and Prevention               | Other | Self                                                                                                      |
| <i>Category:</i> Other<br><i>Additional Information:</i> |       | <i>Description:</i> Funded by CDC, via subcontract through Boston Children's Hospital coordinating center |

Additional Questions:

- Are there other relationships or activities that readers could perceive to have influenced, or that give the appearance of potentially influencing, what you wrote in the submitted work?**  
No.
- What is the manuscript title?**  
Effectiveness of BNT162b2 Vaccine Against Omicron Hospitalizations in Children and Adolescents
- Are you the corresponding author?**  
No.

Certification

I certify that the information provided in this disclosure is complete and accurate.

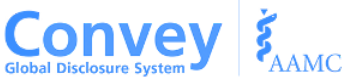

Disclosure Purpose: 22-02826

Summary of Interests

**Company or Organization**

| Entity                                                                                                                                                                                   | Type             | Interest Held By                                                                                                  |
|------------------------------------------------------------------------------------------------------------------------------------------------------------------------------------------|------------------|-------------------------------------------------------------------------------------------------------------------|
| <a href="#">Centers for Disease Control and Prevention</a>                                                                                                                               | Grant / Contract | Self                                                                                                              |
| <i>Recipient Name:</i> Emory University School of Medicine<br><i>Grant / Contract Description:</i> Funded by CDC, via subcontract through Boston Children's Hospital coordinating center |                  | <i>Recipient Type:</i> Institution<br><i>Grant / Contract Purpose:</i> Research<br><i>Additional Information:</i> |

Additional Questions:

- Are there other relationships or activities that readers could perceive to have influenced, or that give the appearance of potentially influencing, what you wrote in the submitted work?**  
No.
- What is the manuscript title?**  
Effectiveness of BNT162b2 Vaccine Against Omicron Hospitalizations in U.S. Children
- Are you the corresponding author?**  
No.

Certification

I certify that the information provided in this disclosure is complete and accurate.



**Disclosure Purpose:** 22-02826

### Summary of Interests

I do not have any interests to disclose at this time.

### Additional Questions:

- Are there other relationships or activities that readers could perceive to have influenced, or that give the appearance of potentially influencing, what you wrote in the submitted work?**  
No.
- What is the manuscript title?**  
Effectiveness of BNT162b2 Vaccine Against Omicron Hospitalizations in Children and Adolescents
- Are you the corresponding author?**  
No.

### Certification

I certify that the information provided in this disclosure is complete and accurate.

**Disclosure Purpose:** 22-02826

**Summary of Interests**

I do not have any interests to disclose at this time.

**Additional Questions:**

- 1. **Are there other relationships or activities that readers could perceive to have influenced, or that give the appearance of potentially influencing, what you wrote in the submitted work?**  
No.
- 2. **What is the manuscript title?**  
Effectiveness of BNT162b2 Vaccine Against Omicron Hospitalizations in Children and Adolescents
- 3. **Are you the corresponding author?**  
No.

**Certification**

I certify that the information provided in this disclosure is complete and accurate.

Disclosure Purpose: 22-02826

Summary of Interests

**Company or Organization**

| Entity                                                                                                                                                                           | Type             | Interest Held By                                                                                                  |
|----------------------------------------------------------------------------------------------------------------------------------------------------------------------------------|------------------|-------------------------------------------------------------------------------------------------------------------|
| Centers for Disease Control and Prevention                                                                                                                                       | Grant / Contract | Self                                                                                                              |
| <i>Recipient Name:</i> University of North Carolina<br><i>Grant / Contract Description:</i> funded by CDC via subcontract through Boston Children's Hospital coordinating center |                  | <i>Recipient Type:</i> Institution<br><i>Grant / Contract Purpose:</i> Research<br><i>Additional Information:</i> |

Additional Questions:

- Are there other relationships or activities that readers could perceive to have influenced, or that give the appearance of potentially influencing, what you wrote in the submitted work?  
No.
- What is the manuscript title?  
Effectiveness of BNT162b2 Vaccine Against Omicron Hospitalizations in Children and Adolescents
- Are you the corresponding author?  
No.

Certification

I certify that the information provided in this disclosure is complete and accurate.

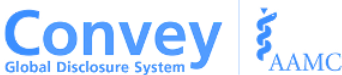



**Disclosure Purpose:** 22-02826

**Summary of Interests**

I do not have any interests to disclose at this time.

**Additional Questions:**

- 1. **Are there other relationships or activities that readers could perceive to have influenced, or that give the appearance of potentially influencing, what you wrote in the submitted work?**  
No.
- 2. **What is the manuscript title?**  
Effectiveness of BNT162b2 Vaccine against Critical COVID-19 in Adolescents
- 3. **Are you the corresponding author?**  
No.

**Certification**

I certify that the information provided in this disclosure is complete and accurate.



Disclosure Purpose: 22-02826

## Summary of Interests

### Company or Organization

| Entity                                                                                                                                                                                                                         | Type             | Interest Held By                                                                                          |
|--------------------------------------------------------------------------------------------------------------------------------------------------------------------------------------------------------------------------------|------------------|-----------------------------------------------------------------------------------------------------------|
| <a href="#">American Thoracic Society</a>                                                                                                                                                                                      | Grant / Contract | Self                                                                                                      |
| <i>Recipient Name:</i> University of California, San Francisco<br><i>Grant / Contract Description:</i> Unrestricted Grant<br><i>Additional Information:</i>                                                                    |                  | <i>Recipient Type:</i> Institution<br><i>Grant / Contract Purpose:</i> Research                           |
| <a href="#">Centers for Disease Control and Prevention</a>                                                                                                                                                                     | Grant / Contract | Self                                                                                                      |
| <i>Recipient Name:</i> University of California, San Francisco<br><i>Grant / Contract Description:</i> CDC surveillance of COVID-19<br><i>Additional Information:</i> grant for research/public health surveillance activities |                  | <i>Recipient Type:</i> Institution<br><i>Grant / Contract Purpose:</i> Other - public health surveillance |
| <a href="#"> Eunice Kennedy Shriver National Institute of Child Health and Human Development</a>                                                                                                                               | Grant / Contract | Self                                                                                                      |
| <i>Recipient Name:</i> University of California, San Francisco<br><i>Grant / Contract Description:</i> K12HD000850<br><i>Additional Information:</i>                                                                           |                  | <i>Recipient Type:</i> Institution<br><i>Grant / Contract Purpose:</i> Research                           |
| <a href="#">National Heart, Lung, and Blood Institute</a>                                                                                                                                                                      | Grant / Contract | Self                                                                                                      |
| <i>Recipient Name:</i> University of California, San Francisco<br><i>Grant / Contract Description:</i> K23HL146936<br><i>Additional Information:</i>                                                                           |                  | <i>Recipient Type:</i> Institution<br><i>Grant / Contract Purpose:</i> Research                           |

### Additional Questions:

- Are there other relationships or activities that readers could perceive to have influenced, or that give the appearance of potentially influencing, what you wrote in the submitted work?**  
 No.
- What is the manuscript title?**  
 Effectiveness of BNT162b2 Vaccine against Critical COVID-19 in Adolescents
- Are you the corresponding author?**  
 No.

### Certification

I certify that the information provided in this disclosure is complete and accurate.
